# Supplementary material for: A New and Effective Method to Trace Tibetan Chicken by Amino Acid Profiling
Source: MDPI journal article supplement (doi:10.3390/foods12040876), 2023-02-18
Supplement: s1 [file s1]

**Table S1.** The data employed for multivariate analysis.

| Number | Region  | Phe<br>g/100 g | Met<br>g/100 g | Lys<br>g/100 g | Thr<br>g/100 g | Leu<br>g/100 g | Ile<br>g/100 g | Val<br>g/100 g | Asp<br>g/100 g | Ser<br>g/100 g | Glu<br>g/100 g | Pro<br>g/100 g | Gly<br>g/100 g | Ala<br>g/100g | His<br>g/100 g | Arg<br>g/100 g | Cys<br>g/100 g | Tyr<br>g/100 g |
|--------|---------|----------------|----------------|----------------|----------------|----------------|----------------|----------------|----------------|----------------|----------------|----------------|----------------|---------------|----------------|----------------|----------------|----------------|
| 1      | Lhasa   | 1.00           | 0.73           | 2.33           | 1.18           | 2.12           | 1.23           | 1.29           | 2.46           | 0.99           | 3.81           | 0.87           | 1.12           | 1.49          | 1.03           | 1.68           | 0.24           | 0.84           |
| 2      | Lhasa   | 0.98           | 0.71           | 2.28           | 1.16           | 2.08           | 1.18           | 1.24           | 2.40           | 0.98           | 3.69           | 0.86           | 1.06           | 1.44          | 1.01           | 1.62           | 0.23           | 0.84           |
| 3      | Lhasa   | 0.87           | 0.60           | 2.05           | 1.04           | 1.84           | 1.03           | 1.11           | 2.12           | 0.88           | 3.32           | 0.78           | 0.97           | 1.30          | 0.90           | 1.45           | 0.23           | 0.69           |
| 4      | Lhasa   | 0.89           | 0.44           | 2.08           | 1.05           | 1.89           | 1.06           | 1.12           | 2.16           | 0.87           | 3.40           | 0.76           | 1.00           | 1.35          | 0.85           | 1.46           | 0.23           | 0.72           |
| 5      | Lhasa   | 0.99           | 0.47           | 2.28           | 1.19           | 2.09           | 1.18           | 1.32           | 2.43           | 1.00           | 3.62           | 0.92           | 1.18           | 1.55          | 1.05           | 1.60           | 0.25           | 0.78           |
| 6      | Lhasa   | 0.88           | 0.59           | 2.01           | 1.04           | 1.84           | 1.03           | 1.12           | 2.15           | 0.89           | 3.35           | 0.93           | 1.28           | 1.43          | 0.84           | 1.52           | 0.23           | 0.71           |
| 7      | Lhasa   | 1.06           | 0.74           | 2.45           | 1.27           | 2.21           | 1.24           | 1.36           | 2.57           | 1.12           | 3.97           | 1.01           | 1.32           | 1.63          | 1.09           | 1.81           | 0.29           | 0.86           |
| 8      | Lhasa   | 1.08           | 0.76           | 2.48           | 1.29           | 2.25           | 1.27           | 1.37           | 2.64           | 1.12           | 4.00           | 0.96           | 1.17           | 1.59          | 1.11           | 1.78           | 0.27           | 0.89           |
| 9      | Lhasa   | 0.97           | 0.66           | 2.25           | 1.15           | 2.02           | 1.12           | 1.21           | 2.32           | 0.98           | 3.61           | 0.93           | 1.18           | 1.48          | 1.01           | 1.63           | 0.26           | 0.77           |
| 10     | Lhasa   | 1.01           | 0.71           | 2.34           | 1.19           | 2.11           | 1.19           | 1.25           | 2.45           | 0.99           | 3.79           | 0.90           | 1.11           | 1.48          | 1.06           | 1.65           | 0.22           | 0.84           |
| 11     | Lhasa   | 0.96           | 0.66           | 2.21           | 1.11           | 1.98           | 1.14           | 1.20           | 2.33           | 0.93           | 3.60           | 0.83           | 1.03           | 1.39          | 0.97           | 1.57           | 0.17           | 0.78           |
| 12     | Lhasa   | 1.17           | 0.81           | 2.74           | 1.37           | 2.48           | 1.45           | 1.49           | 2.83           | 1.14           | 4.32           | 0.99           | 1.24           | 1.69          | 1.22           | 1.95           | 0.21           | 1.02           |
| 13     | Lhasa   | 0.90           | 0.66           | 2.12           | 1.07           | 1.93           | 1.12           | 1.15           | 2.21           | 0.90           | 3.43           | 0.77           | 0.98           | 1.33          | 0.91           | 1.50           | 0.20           | 0.77           |
| 14     | Lhasa   | 0.94           | 0.68           | 2.24           | 1.13           | 2.02           | 1.18           | 1.22           | 2.34           | 0.95           | 3.62           | 0.82           | 1.04           | 1.40          | 0.97           | 1.56           | 0.16           | 0.82           |
| 15     | Lhasa   | 1.00           | 0.73           | 2.34           | 1.16           | 2.12           | 1.23           | 1.25           | 2.41           | 0.97           | 3.79           | 0.86           | 1.06           | 1.45          | 1.04           | 1.62           | 0.20           | 0.85           |
| 16     | Lhasa   | 0.95           | 0.70           | 2.25           | 1.13           | 2.04           | 1.17           | 1.18           | 2.33           | 0.94           | 3.69           | 0.82           | 1.02           | 1.39          | 0.97           | 1.57           | 0.19           | 0.83           |
| 17     | Lhasa   | 0.88           | 0.62           | 2.06           | 1.04           | 1.86           | 1.08           | 1.12           | 2.15           | 0.87           | 3.26           | 0.77           | 0.96           | 1.29          | 0.87           | 1.45           | 0.18           | 0.76           |
| 18     | Lhasa   | 0.83           | 0.57           | 1.96           | 0.98           | 1.76           | 1.02           | 1.03           | 2.02           | 0.82           | 3.25           | 0.75           | 0.97           | 1.22          | 0.80           | 1.40           | 0.19           | 0.72           |
| 19     | Lhasa   | 0.89           | 0.64           | 2.10           | 1.05           | 1.90           | 1.11           | 1.12           | 2.17           | 0.87           | 3.39           | 0.78           | 0.96           | 1.30          | 0.71           | 1.47           | 0.16           | 0.76           |
| 20     | Shannan | 0.83           | 0.61           | 1.98           | 1.01           | 1.84           | 1.02           | 1.05           | 2.06           | 0.82           | 3.17           | 0.76           | 0.94           | 1.31          | 0.83           | 1.39           | 0.27           | 0.67           |
| 21     | Shannan | 0.51           | 0.27           | 1.18           | 0.60           | 1.08           | 0.60           | 0.62           | 1.16           | 0.52           | 1.88           | 0.51           | 0.69           | 0.81          | 0.50           | 0.86           | 0.15           | 0.35           |
| 22     | Shannan | 0.80           | 0.34           | 1.88           | 0.94           | 1.74           | 0.97           | 0.98           | 1.89           | 0.78           | 2.98           | 0.71           | 0.88           | 1.23          | 0.79           | 1.30           | 0.22           | 0.58           |

|    |         |      |      |      |      |      |      |      |      |      |      |      |      |      |      |      |      |      |
|----|---------|------|------|------|------|------|------|------|------|------|------|------|------|------|------|------|------|------|
| 23 | Shannan | 0.81 | 0.55 | 1.90 | 0.96 | 1.76 | 0.98 | 1.02 | 1.90 | 0.82 | 3.02 | 0.77 | 0.99 | 1.29 | 0.84 | 1.36 | 0.25 | 0.59 |
| 24 | Shannan | 0.85 | 0.39 | 1.99 | 1.00 | 1.86 | 1.05 | 1.03 | 2.03 | 0.84 | 3.24 | 0.77 | 0.97 | 1.31 | 0.73 | 1.40 | 0.23 | 0.65 |
| 25 | Shannan | 0.89 | 0.64 | 2.08 | 1.06 | 1.92 | 1.08 | 1.11 | 2.19 | 0.88 | 3.37 | 0.77 | 0.97 | 1.36 | 0.96 | 1.45 | 0.26 | 0.67 |
| 26 | Shannan | 0.86 | 0.53 | 1.98 | 1.00 | 1.83 | 1.04 | 1.05 | 2.08 | 0.83 | 3.19 | 0.75 | 0.95 | 1.31 | 0.75 | 1.37 | 0.26 | 0.63 |
| 27 | Shannan | 0.88 | 0.66 | 2.06 | 1.04 | 1.93 | 1.09 | 1.09 | 2.15 | 0.85 | 3.28 | 0.78 | 0.96 | 1.36 | 0.85 | 1.45 | 0.24 | 0.74 |
| 28 | Shannan | 0.90 | 0.51 | 2.12 | 1.06 | 1.94 | 1.10 | 1.10 | 2.20 | 0.88 | 3.39 | 0.78 | 0.97 | 1.38 | 0.87 | 1.45 | 0.26 | 0.67 |
| 29 | Shannan | 0.86 | 0.59 | 2.00 | 1.01 | 1.85 | 1.06 | 1.06 | 2.07 | 0.86 | 3.09 | 0.77 | 0.94 | 1.28 | 0.81 | 1.40 | 0.23 | 0.68 |
| 30 | Shannan | 1.05 | 0.70 | 2.43 | 1.22 | 2.24 | 1.26 | 1.30 | 2.53 | 1.05 | 3.86 | 0.93 | 1.15 | 1.57 | 0.95 | 1.69 | 0.32 | 0.85 |
| 31 | Shannan | 0.79 | 0.29 | 1.84 | 0.93 | 1.71 | 0.97 | 0.95 | 1.91 | 0.77 | 2.92 | 0.71 | 0.87 | 1.19 | 0.71 | 1.27 | 0.22 | 0.58 |
| 32 | Shannan | 0.79 | 0.36 | 1.86 | 0.92 | 1.71 | 0.97 | 0.95 | 1.91 | 0.76 | 2.96 | 0.70 | 0.86 | 1.19 | 0.67 | 1.31 | 0.21 | 0.59 |
| 33 | Shannan | 0.88 | 0.63 | 2.01 | 1.02 | 1.89 | 1.07 | 1.07 | 2.12 | 0.84 | 3.25 | 0.80 | 1.01 | 1.34 | 0.82 | 1.44 | 0.23 | 0.70 |
| 34 | Shannan | 0.96 | 0.67 | 2.20 | 1.11 | 2.05 | 1.16 | 1.14 | 2.31 | 0.93 | 3.54 | 0.91 | 1.18 | 1.45 | 0.86 | 1.60 | 0.22 | 0.77 |
| 35 | Shannan | 0.90 | 0.48 | 2.07 | 1.05 | 1.94 | 1.10 | 1.10 | 2.20 | 0.88 | 3.36 | 0.84 | 1.05 | 1.39 | 0.84 | 1.49 | 0.25 | 0.70 |
| 36 | Shannan | 0.93 | 0.44 | 2.09 | 1.07 | 1.96 | 1.12 | 1.13 | 2.22 | 0.86 | 3.33 | 0.82 | 1.01 | 1.39 | 0.82 | 1.46 | 0.26 | 0.67 |
| 37 | Shannan | 0.89 | 0.63 | 2.04 | 1.04 | 1.90 | 1.09 | 1.12 | 2.16 | 0.87 | 3.28 | 0.80 | 0.99 | 1.37 | 0.86 | 1.46 | 0.22 | 0.68 |
| 38 | Shannan | 0.88 | 0.63 | 2.00 | 1.00 | 1.87 | 1.06 | 1.05 | 2.09 | 0.82 | 3.27 | 0.81 | 1.02 | 1.33 | 0.75 | 1.47 | 0.22 | 0.70 |
| 39 | Shannan | 0.89 | 0.43 | 2.03 | 0.99 | 1.84 | 1.05 | 1.02 | 2.07 | 0.82 | 3.29 | 0.79 | 0.97 | 1.30 | 0.73 | 1.42 | 0.23 | 0.65 |
| 40 | Shannan | 0.83 | 0.38 | 1.90 | 0.96 | 1.77 | 1.01 | 0.99 | 2.02 | 0.80 | 3.14 | 0.72 | 0.87 | 1.23 | 0.70 | 1.34 | 0.23 | 0.61 |
| 41 | Shannan | 0.84 | 0.59 | 1.93 | 0.97 | 1.79 | 1.04 | 1.06 | 2.01 | 0.79 | 3.04 | 0.74 | 0.90 | 1.27 | 0.72 | 1.36 | 0.26 | 0.65 |
| 42 | Shannan | 0.83 | 0.60 | 1.99 | 0.99 | 1.90 | 1.06 | 1.08 | 2.05 | 0.83 | 3.25 | 0.79 | 1.00 | 1.33 | 0.74 | 1.44 | 0.29 | 0.69 |
| 43 | Shannan | 0.83 | 0.33 | 1.97 | 0.97 | 1.87 | 1.05 | 1.04 | 1.99 | 0.81 | 3.17 | 0.77 | 0.96 | 1.29 | 0.70 | 1.38 | 0.25 | 0.64 |
| 44 | Shannan | 0.95 | 0.68 | 2.19 | 1.11 | 2.08 | 1.16 | 1.15 | 2.30 | 0.93 | 3.66 | 0.87 | 1.11 | 1.45 | 0.82 | 1.60 | 0.25 | 0.79 |
| 45 | Shannan | 0.81 | 0.50 | 1.87 | 0.93 | 1.78 | 0.98 | 0.98 | 1.91 | 0.79 | 3.05 | 0.80 | 1.01 | 1.25 | 0.68 | 1.37 | 0.26 | 0.63 |
| 46 | Shannan | 0.86 | 0.55 | 2.01 | 1.00 | 1.93 | 1.07 | 1.07 | 2.06 | 0.83 | 3.26 | 0.81 | 1.03 | 1.34 | 0.82 | 1.45 | 0.29 | 0.70 |
| 47 | Linzhi  | 0.90 | 0.66 | 2.22 | 1.10 | 2.04 | 1.17 | 1.25 | 2.29 | 0.94 | 3.60 | 0.84 | 1.02 | 1.38 | 0.91 | 1.60 | 0.19 | 0.82 |
| 48 | Linzhi  | 0.97 | 0.63 | 2.27 | 1.11 | 2.09 | 1.18 | 1.24 | 2.28 | 0.94 | 3.66 | 0.88 | 1.05 | 1.40 | 0.83 | 1.62 | 0.23 | 0.86 |

|    |        |      |      |      |      |      |      |      |      |      |      |      |      |      |      |      |      |      |
|----|--------|------|------|------|------|------|------|------|------|------|------|------|------|------|------|------|------|------|
| 49 | Linzhi | 1.01 | 0.71 | 2.57 | 1.25 | 2.33 | 1.33 | 1.40 | 2.56 | 1.05 | 4.09 | 0.94 | 1.12 | 1.54 | 1.02 | 1.82 | 0.22 | 0.97 |
| 50 | Linzhi | 0.91 | 0.69 | 2.27 | 1.12 | 2.11 | 1.19 | 1.25 | 2.28 | 0.94 | 3.68 | 0.82 | 0.98 | 1.37 | 0.87 | 1.66 | 0.23 | 0.85 |
| 51 | Linzhi | 0.92 | 0.66 | 2.22 | 1.10 | 2.04 | 1.16 | 1.21 | 2.22 | 0.93 | 3.62 | 0.85 | 1.02 | 1.37 | 0.80 | 1.61 | 0.23 | 0.81 |
| 52 | Linzhi | 1.04 | 0.75 | 2.56 | 1.27 | 2.37 | 1.36 | 1.41 | 2.55 | 1.08 | 4.11 | 0.99 | 1.19 | 1.57 | 0.95 | 1.85 | 0.25 | 0.96 |
| 53 | Linzhi | 0.91 | 0.66 | 2.27 | 1.10 | 2.08 | 1.18 | 1.21 | 2.24 | 0.93 | 3.64 | 0.83 | 0.98 | 1.37 | 0.77 | 1.60 | 0.20 | 0.82 |
| 54 | Linzhi | 1.03 | 0.45 | 2.53 | 1.23 | 2.33 | 1.32 | 1.39 | 2.51 | 1.04 | 3.99 | 0.93 | 1.13 | 1.54 | 1.01 | 1.73 | 0.23 | 0.89 |
| 55 | Linzhi | 0.96 | 0.65 | 2.41 | 1.16 | 2.18 | 1.25 | 1.32 | 2.34 | 0.98 | 3.78 | 0.88 | 1.05 | 1.46 | 1.00 | 1.68 | 0.25 | 0.89 |
| 56 | Linzhi | 1.03 | 0.57 | 2.06 | 1.00 | 1.87 | 1.07 | 1.09 | 2.00 | 0.87 | 3.40 | 0.82 | 0.94 | 1.25 | 0.66 | 1.49 | 0.20 | 0.78 |
| 57 | Linzhi | 0.96 | 0.55 | 1.82 | 0.90 | 1.68 | 0.96 | 1.01 | 1.87 | 0.80 | 3.01 | 0.95 | 1.23 | 1.26 | 0.62 | 1.44 | 0.20 | 0.70 |
| 58 | Linzhi | 1.05 | 0.58 | 2.06 | 1.00 | 1.84 | 1.05 | 1.09 | 2.05 | 0.89 | 3.34 | 0.85 | 0.98 | 1.23 | 0.69 | 1.47 | 0.24 | 0.77 |
| 59 | Linzhi | 1.35 | 0.64 | 2.61 | 1.30 | 2.44 | 1.36 | 1.41 | 2.66 | 1.12 | 4.37 | 1.05 | 1.27 | 1.62 | 0.82 | 1.79 | 0.26 | 0.90 |
| 60 | Linzhi | 1.06 | 0.72 | 2.47 | 1.22 | 2.30 | 1.30 | 1.37 | 2.49 | 1.02 | 4.02 | 0.97 | 1.12 | 1.54 | 0.75 | 1.78 | 0.27 | 0.96 |
| 61 | Linzhi | 0.97 | 0.41 | 2.32 | 1.13 | 2.12 | 1.19 | 1.26 | 2.32 | 0.95 | 3.78 | 0.84 | 0.97 | 1.39 | 0.80 | 1.62 | 0.21 | 0.83 |
| 62 | Linzhi | 1.03 | 0.73 | 2.53 | 1.22 | 2.31 | 1.31 | 1.37 | 2.52 | 1.01 | 4.04 | 0.95 | 1.09 | 1.54 | 0.89 | 1.81 | 0.25 | 0.99 |
| 63 | Linzhi | 0.94 | 0.67 | 2.30 | 1.11 | 2.08 | 1.19 | 1.27 | 2.29 | 0.94 | 3.65 | 0.88 | 1.06 | 1.43 | 0.81 | 1.62 | 0.21 | 0.88 |
| 64 | Linzhi | 1.00 | 0.69 | 2.39 | 1.16 | 2.20 | 1.23 | 1.28 | 2.40 | 0.98 | 3.78 | 0.91 | 1.08 | 1.45 | 0.84 | 1.70 | 0.25 | 0.94 |
| 65 | Linzhi | 0.88 | 0.67 | 2.13 | 1.06 | 1.99 | 1.12 | 1.19 | 2.17 | 0.89 | 3.47 | 0.80 | 0.96 | 1.34 | 0.89 | 1.53 | 0.21 | 0.83 |
| 66 | Linzhi | 0.93 | 0.45 | 2.23 | 1.08 | 2.08 | 1.16 | 1.20 | 2.25 | 0.92 | 3.66 | 0.89 | 1.09 | 1.40 | 0.85 | 1.59 | 0.23 | 0.82 |
| 67 | Linzhi | 0.85 | 0.64 | 2.06 | 1.02 | 1.91 | 1.08 | 1.13 | 2.09 | 0.85 | 3.32 | 0.80 | 0.95 | 1.29 | 0.86 | 1.48 | 0.23 | 0.81 |
| 68 | Linzhi | 0.91 | 0.68 | 2.19 | 1.10 | 2.01 | 1.13 | 1.23 | 2.24 | 0.92 | 3.59 | 0.83 | 1.04 | 1.40 | 0.86 | 1.57 | 0.25 | 0.84 |
| 69 | Linzhi | 0.95 | 0.70 | 2.30 | 1.12 | 2.11 | 1.17 | 1.21 | 2.29 | 0.93 | 3.69 | 0.89 | 1.05 | 1.39 | 0.86 | 1.63 | 0.26 | 0.89 |
| 70 | Linzhi | 0.93 | 0.68 | 2.24 | 1.10 | 2.08 | 1.15 | 1.19 | 2.26 | 0.92 | 3.62 | 0.87 | 1.06 | 1.39 | 0.84 | 1.57 | 0.23 | 0.88 |
| 71 | Linzhi | 0.84 | 0.59 | 2.01 | 0.99 | 1.83 | 1.03 | 1.09 | 2.03 | 0.85 | 3.17 | 0.80 | 0.95 | 1.24 | 0.73 | 1.42 | 0.19 | 0.80 |
| 72 | Linzhi | 0.89 | 0.63 | 2.13 | 1.05 | 1.96 | 1.11 | 1.18 | 2.17 | 0.90 | 3.38 | 0.83 | 1.01 | 1.34 | 0.75 | 1.55 | 0.21 | 0.86 |
| 73 | Linzhi | 0.92 | 0.64 | 2.21 | 1.08 | 2.01 | 1.16 | 1.24 | 2.22 | 0.92 | 3.44 | 0.86 | 1.03 | 1.38 | 0.79 | 1.56 | 0.22 | 0.87 |
| 74 | Xigaze | 0.90 | 0.36 | 2.14 | 1.06 | 2.03 | 1.13 | 1.13 | 2.17 | 0.88 | 3.51 | 0.82 | 1.04 | 1.40 | 0.84 | 1.53 | 0.27 | 0.72 |

|    |        |      |      |      |      |      |      |      |      |      |      |      |      |      |      |      |      |      |
|----|--------|------|------|------|------|------|------|------|------|------|------|------|------|------|------|------|------|------|
| 75 | Xigaze | 0.87 | 0.58 | 2.09 | 1.03 | 1.99 | 1.11 | 1.13 | 2.13 | 0.87 | 3.35 | 0.82 | 1.04 | 1.39 | 0.84 | 1.51 | 0.29 | 0.73 |
| 76 | Xigaze | 0.88 | 0.38 | 2.09 | 1.02 | 1.95 | 1.09 | 1.10 | 2.07 | 0.87 | 3.32 | 0.79 | 0.99 | 1.36 | 0.73 | 1.47 | 0.28 | 0.65 |
| 77 | Xigaze | 0.88 | 0.41 | 2.09 | 1.01 | 1.99 | 1.11 | 1.10 | 2.09 | 0.85 | 3.30 | 0.80 | 1.01 | 1.37 | 0.82 | 1.48 | 0.25 | 0.71 |
| 78 | Xigaze | 0.87 | 0.36 | 2.12 | 1.03 | 2.01 | 1.13 | 1.11 | 2.16 | 0.86 | 3.33 | 0.80 | 0.99 | 1.36 | 0.96 | 1.50 | 0.23 | 0.72 |
| 79 | Xigaze | 0.88 | 0.62 | 2.16 | 1.06 | 2.03 | 1.13 | 1.15 | 2.22 | 0.88 | 3.35 | 0.81 | 1.01 | 1.39 | 1.03 | 1.54 | 0.23 | 0.80 |
| 80 | Xigaze | 0.93 | 0.68 | 2.27 | 1.13 | 2.13 | 1.19 | 1.20 | 2.36 | 0.95 | 3.69 | 0.86 | 1.07 | 1.47 | 0.91 | 1.62 | 0.21 | 0.82 |
| 81 | Xigaze | 0.84 | 0.61 | 2.06 | 1.01 | 1.92 | 1.07 | 1.07 | 2.11 | 0.85 | 3.32 | 0.77 | 0.93 | 1.31 | 0.84 | 1.46 | 0.23 | 0.72 |
| 82 | Xigaze | 0.84 | 0.57 | 1.98 | 0.98 | 1.87 | 1.04 | 1.03 | 2.03 | 0.82 | 3.13 | 0.77 | 0.95 | 1.29 | 0.73 | 1.44 | 0.23 | 0.73 |
| 83 | Xigaze | 0.86 | 0.41 | 2.08 | 1.03 | 1.98 | 1.09 | 1.06 | 2.13 | 0.85 | 3.44 | 0.80 | 0.97 | 1.33 | 0.65 | 1.50 | 0.24 | 0.73 |
| 84 | Xigaze | 0.87 | 0.38 | 2.11 | 1.03 | 1.98 | 1.10 | 1.09 | 2.10 | 0.85 | 3.33 | 0.81 | 1.00 | 1.35 | 0.78 | 1.49 | 0.25 | 0.71 |
| 85 | Xigaze | 0.79 | 0.48 | 1.89 | 0.97 | 1.78 | 0.99 | 1.03 | 1.95 | 0.85 | 3.15 | 0.77 | 0.97 | 1.27 | 0.62 | 1.41 | 0.28 | 0.67 |
| 86 | Xigaze | 0.76 | 0.26 | 1.84 | 0.91 | 1.74 | 0.97 | 0.97 | 1.85 | 0.75 | 2.90 | 0.72 | 0.88 | 1.20 | 0.81 | 1.30 | 0.22 | 0.61 |
| 87 | Xigaze | 0.83 | 0.36 | 1.99 | 0.99 | 1.88 | 1.04 | 1.02 | 2.02 | 0.84 | 3.24 | 0.80 | 0.98 | 1.27 | 0.65 | 1.45 | 0.26 | 0.71 |
| 88 | Xigaze | 0.88 | 0.58 | 2.10 | 1.04 | 1.97 | 1.11 | 1.13 | 2.15 | 0.87 | 3.32 | 0.83 | 1.00 | 1.35 | 0.85 | 1.50 | 0.27 | 0.75 |
| 89 | Xigaze | 0.86 | 0.61 | 2.08 | 1.03 | 1.94 | 1.07 | 1.11 | 2.14 | 0.85 | 3.23 | 0.82 | 1.01 | 1.35 | 0.94 | 1.49 | 0.25 | 0.72 |

---

**Table S2.** Composition and concentrations of seventeen amino acids in Tibetan chicken from different cities. Values are means±SD.

| Amino acids   | All cities | Lhasa                   | Shannan                 | Linzhi                  | Xigaze                  |
|---------------|------------|-------------------------|-------------------------|-------------------------|-------------------------|
| Phe (g/100 g) | 0.91±0.10  | 0.96±0.08 <sup>a</sup>  | 0.85±0.09 <sup>b</sup>  | 0.97±0.10 <sup>a</sup>  | 0.86±0.04 <sup>b</sup>  |
| Met (g/100 g) | 0.57±0.13  | 0.66±0.09 <sup>a</sup>  | 0.52±0.13 <sup>b</sup>  | 0.63±0.08 <sup>a</sup>  | 0.48±0.13 <sup>b</sup>  |
| Lys (g/100 g) | 2.14±0.22  | 2.24±0.19 <sup>a</sup>  | 1.98±0.20 <sup>b</sup>  | 2.27±0.19 <sup>a</sup>  | 2.07±0.10 <sup>b</sup>  |
| Thr (g/100 g) | 1.07±0.11  | 1.14±0.10 <sup>a</sup>  | 1.00±0.10 <sup>b</sup>  | 1.11±0.09 <sup>a</sup>  | 1.02±0.05 <sup>b</sup>  |
| Leu (g/100 g) | 1.98±0.19  | 2.03±0.17 <sup>ab</sup> | 1.85±0.19 <sup>c</sup>  | 2.09±0.18 <sup>a</sup>  | 1.95±0.10 <sup>bc</sup> |
| Ile (g/100 g) | 1.12±0.11  | 1.16±0.10 <sup>a</sup>  | 1.04±0.11 <sup>b</sup>  | 1.18±0.10 <sup>a</sup>  | 1.09±0.06 <sup>b</sup>  |
| Val (g/100 g) | 1.15±0.13  | 1.22±0.11 <sup>a</sup>  | 1.05±0.11 <sup>b</sup>  | 1.24±0.11 <sup>a</sup>  | 1.09±0.06 <sup>b</sup>  |
| Asp (g/100 g) | 2.19±0.22  | 2.34±0.20 <sup>a</sup>  | 2.05±0.23 <sup>b</sup>  | 2.28±0.19 <sup>a</sup>  | 2.10±0.11 <sup>b</sup>  |
| Ser (g/100 g) | 0.90±0.09  | 0.96±0.09 <sup>a</sup>  | 0.83±0.09 <sup>b</sup>  | 0.94±0.07 <sup>a</sup>  | 0.85±0.04 <sup>b</sup>  |
| Glu (g/100 g) | 3.45±0.36  | 3.63±0.28 <sup>a</sup>  | 3.19±0.33 <sup>b</sup>  | 3.66±0.31 <sup>a</sup>  | 3.31±0.17 <sup>b</sup>  |
| Pro (g/100 g) | 0.83±0.08  | 0.86±0.08 <sup>a</sup>  | 0.78±0.08 <sup>b</sup>  | 0.88±0.06 <sup>a</sup>  | 0.80±0.03 <sup>b</sup>  |
| Gly (g/100 g) | 1.02±0.10  | 1.09±0.11 <sup>a</sup>  | 0.97±0.10 <sup>b</sup>  | 1.05±0.08 <sup>a</sup>  | 0.99±0.04 <sup>b</sup>  |
| Ala (g/100 g) | 1.37±0.12  | 1.43±0.12 <sup>a</sup>  | 1.31±0.13 <sup>c</sup>  | 1.40±0.11 <sup>ab</sup> | 1.34±0.06 <sup>bc</sup> |
| His (g/100 g) | 0.84±0.13  | 0.97±0.12 <sup>a</sup>  | 0.78±0.10 <sup>b</sup>  | 0.83±0.10 <sup>b</sup>  | 0.81±0.12 <sup>b</sup>  |
| Arg (g/100 g) | 1.52±0.15  | 1.60±0.14 <sup>a</sup>  | 1.41±0.14 <sup>b</sup>  | 1.62±0.12 <sup>a</sup>  | 1.47±0.07 <sup>b</sup>  |
| Cys (g/100 g) | 0.23±0.03  | 0.22±0.04 <sup>c</sup>  | 0.24±0.03 <sup>ab</sup> | 0.23±0.02 <sup>bc</sup> | 0.25±0.02 <sup>a</sup>  |
| Tyr (g/100 g) | 0.76±0.11  | 0.80±0.08 <sup>b</sup>  | 0.66±0.09 <sup>d</sup>  | 0.86±0.07 <sup>a</sup>  | 0.72±0.05 <sup>c</sup>  |
| EAA (g/100 g) | 8.94±0.94  | 9.40±0.82 <sup>a</sup>  | 8.30±0.90 <sup>b</sup>  | 9.50±0.76 <sup>a</sup>  | 8.55±0.46 <sup>b</sup>  |
| FAA (g/100 g) | 11.43±1.13 | 12.07±0.99 <sup>a</sup> | 10.65±1.11 <sup>b</sup> | 12.05±0.89 <sup>a</sup> | 10.97±0.53 <sup>b</sup> |
| TAA (g/100 g) | 22.06±2.22 | 23.28±1.99 <sup>a</sup> | 20.53±2.16 <sup>b</sup> | 23.26±1.77 <sup>a</sup> | 21.20±1.07 <sup>b</sup> |

Note: the letters without common are significantly different ( $p < 0.05$ ). FAA: flavor amino acids; EAA: essential amino acids; TAA: total amino acids.

**Table S3.** Comparison of amino acids with the amino acid pattern profile recommended by the World Health Organization and the Food and Agriculture Organization of the United Nations (WHO/FAO).

| Amino acids       | Recommended value by WHO/FAO | Lhasa      | Shannan    | Linzhi     | Xigaze     |
|-------------------|------------------------------|------------|------------|------------|------------|
| (Phe+Tyr)/TAA (%) | 6.00                         | 7.57±0.14  | 7.37±0.14  | 7.86±0.29  | 7.44±0.10  |
| (Met+Cys)/TAA (%) | 3.50                         | 3.73±0.27  | 3.67±0.50  | 3.70±0.37  | 3.42±0.52  |
| Lys/TAA (%)       | 5.50                         | 9.62±0.14  | 9.67±0.14  | 9.77±0.18  | 9.75±0.11  |
| Thr/TAA (%)       | 4.00                         | 4.88±0.04  | 4.86±0.06  | 4.79±0.07  | 4.82±0.05  |
| Leu/TAA (%)       | 7.00                         | 8.71±0.12  | 9.01±0.12  | 8.97±0.16  | 9.19±0.13  |
| Ile/TAA (%)       | 4.00                         | 4.98±0.13  | 5.09±0.08  | 5.08±0.08  | 5.13±0.08  |
| Val/TAA (%)       | 5.00                         | 5.23±0.10  | 5.11±0.08  | 5.33±0.11  | 5.13±0.07  |
| EAA/TAA (%)       | 40.00                        | 40.37±0.52 | 40.40±0.33 | 40.83±0.36 | 40.31±0.29 |
| FAA/TAA (%)       | —                            | 51.84±0.44 | 51.92±0.40 | 51.82±0.67 | 51.75±0.50 |

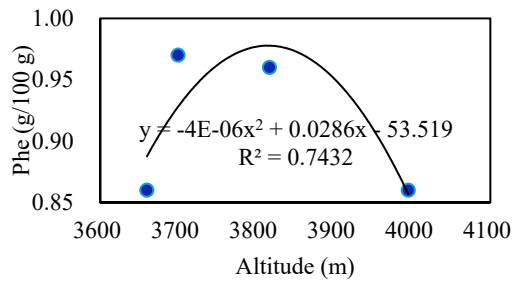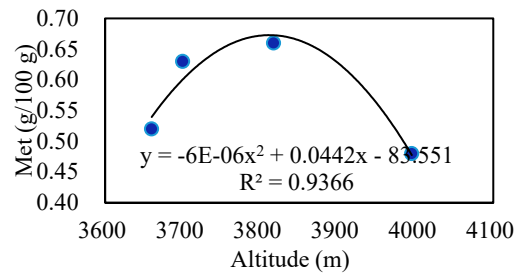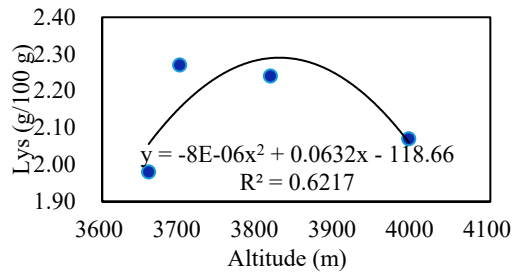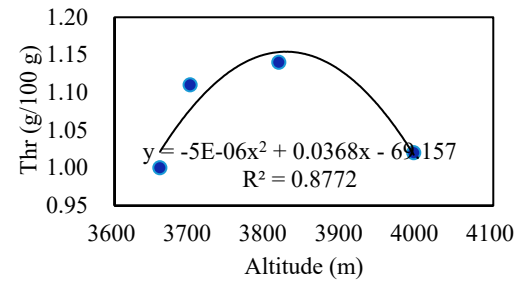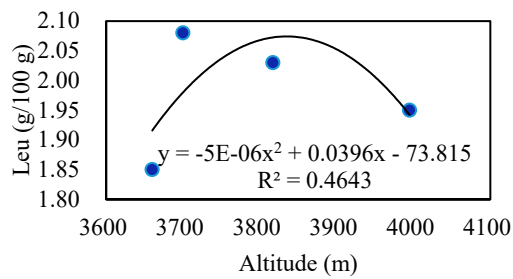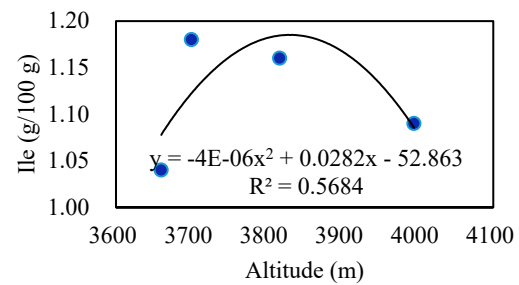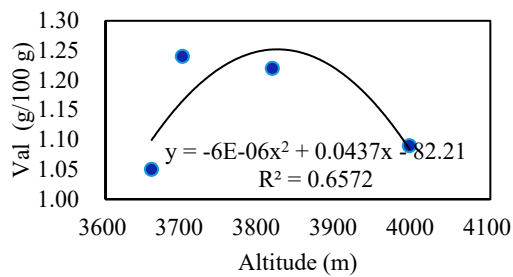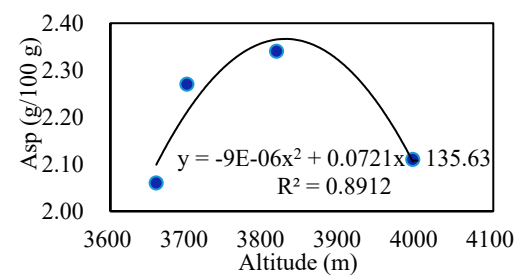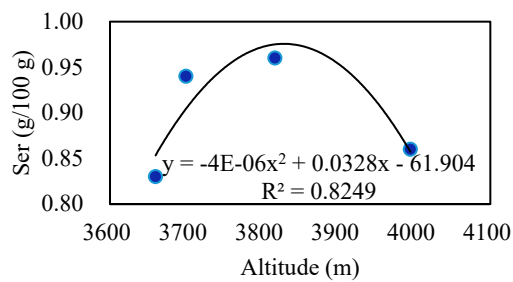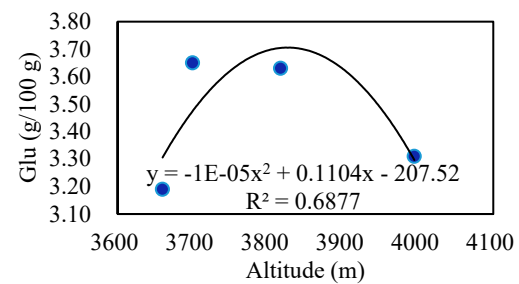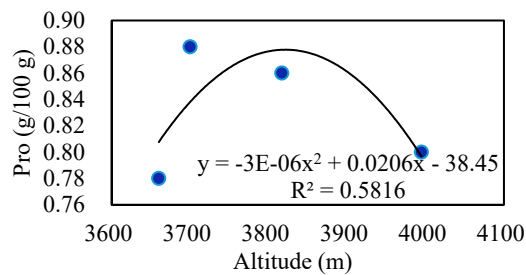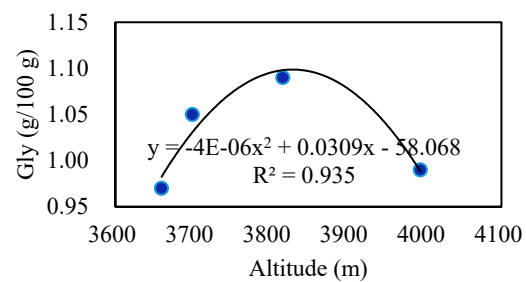

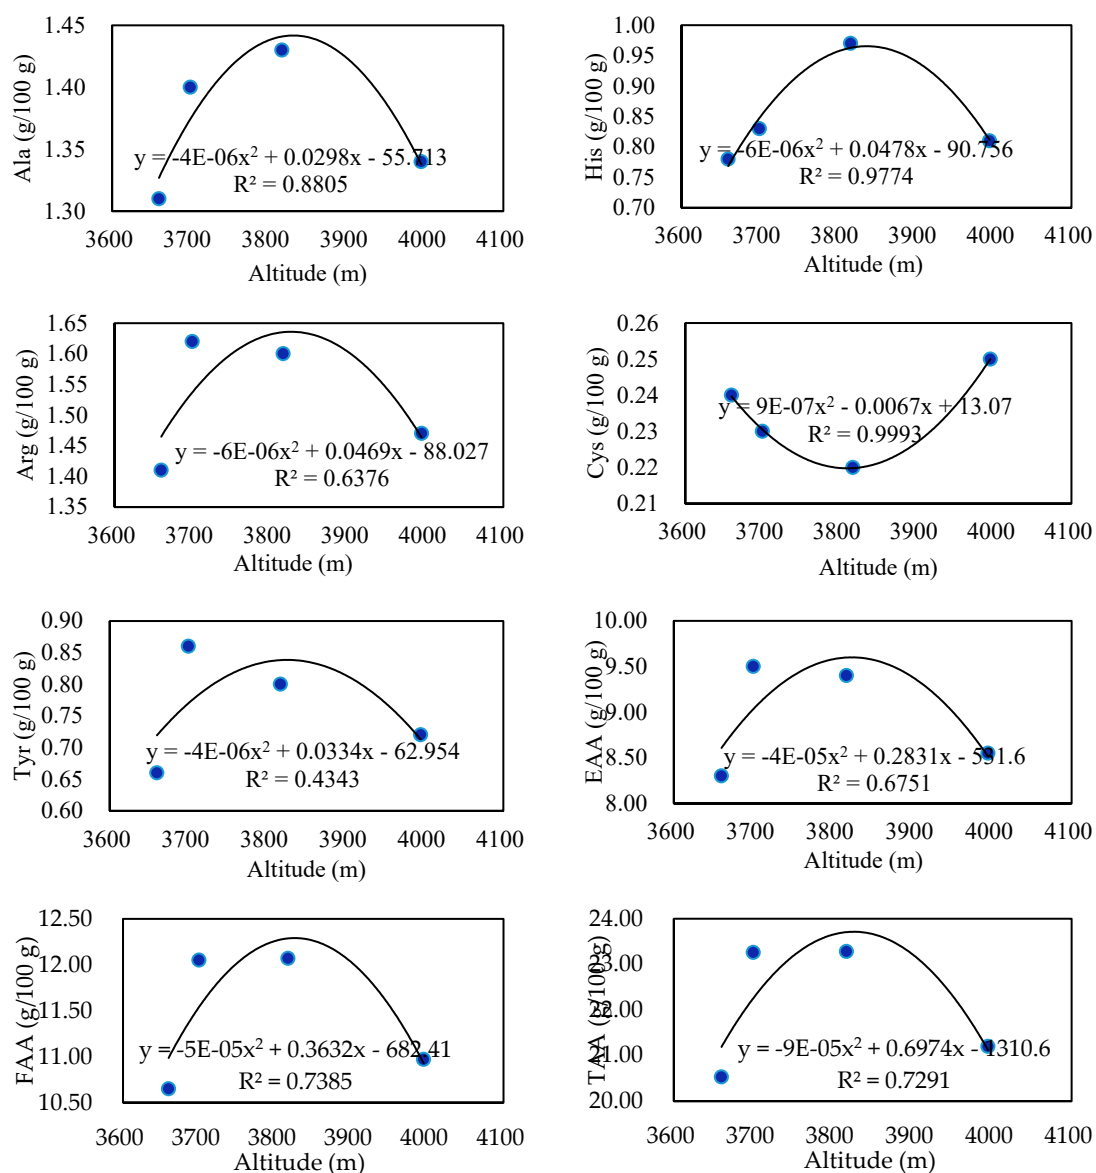

**Figure S1.** Relationship between means amino acids concentration and altitude of different cities
